# Supplementary material for: Target-Specific Exosome Isolation through Aptamer-Based Microfluidics
Source: MDPI journal article supplement (doi:10.3390/bios12040257), 2022-04-18
Supplement: s1 [file s1]

# Target-Specific Exosome Isolation through Aptamer-Based Microfluidics

Zixuan Zhou<sup>1</sup>, Yan Chen<sup>2</sup> and Xiang Qian<sup>1,\*</sup>

<sup>1</sup> Tsinghua-Shenzhen International Graduate School, Tsinghua University, Shenzhen 518055, China; zhouzx19@mails.tsinghua.edu.cn

<sup>2</sup> Shenzhen Institutes of Advanced Technology, Chinese Academy of Sciences, Shenzhen 518055, China; yan.chen@siat.ac.cn

\* Correspondence: qian.xiang@sz.tsinghua.edu.cn

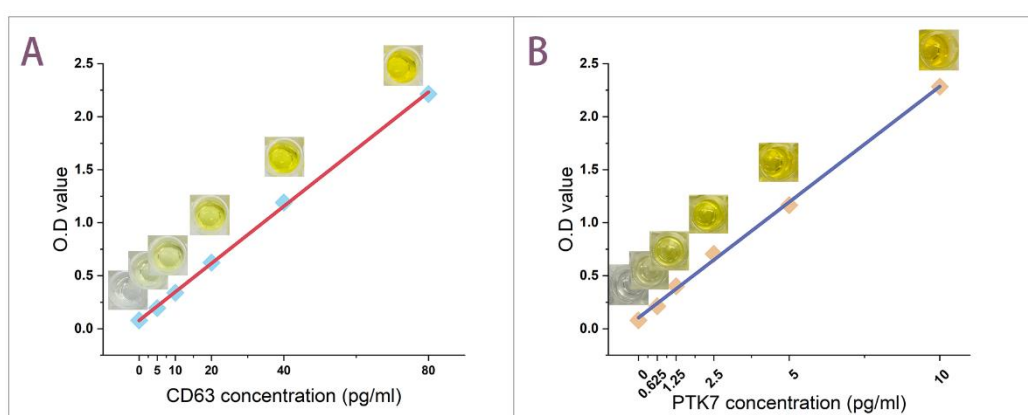

**Figure S1.** Standard curve of ELISA. (A) The correlation between O.D value and CD63 concentration. (B) The correlation between O.D value and PTK7 concentration

**Table S1.** Protein concentration of EVs recovery.

|                 | Sample                      | Kit-6                                                                               | Chip-6                                                                              | Kit-7                                                                               | Chip-7                                                                                | Kit-8                                                                                 | Chip-8                                                                                |
|-----------------|-----------------------------|-------------------------------------------------------------------------------------|-------------------------------------------------------------------------------------|-------------------------------------------------------------------------------------|---------------------------------------------------------------------------------------|---------------------------------------------------------------------------------------|---------------------------------------------------------------------------------------|
| CD63            | O.D value (dilution 5-fold) | 0.5106                                                                              | 0.581                                                                               | 0.5107                                                                              | 0.5316                                                                                | 0.5025                                                                                | 0.5839                                                                                |
|                 | Color (dilution 5-fold)     |  |  |  |  |  |  |
|                 | CD63 concentration (pg/ml)  | 80.39                                                                               | 93.48                                                                               | 80.41                                                                               | 84.29                                                                                 | 78.88                                                                                 | 94.01                                                                                 |
| PTK7            | O.D value (dilution 5-fold) | 0.541                                                                               | 0.548                                                                               | 0.518                                                                               | 0.561                                                                                 | 0.568                                                                                 | 0.587                                                                                 |
|                 | Color (dilution 5-fold)     |  |  |  |  |  |  |
|                 | PTK7 concentration (pg/ml)  | 10.032                                                                              | 10.19                                                                               | 9.51                                                                                | 10.49                                                                                 | 10.65                                                                                 | 11.09                                                                                 |
| integrated area |                             | 433,804,170                                                                         | 42,912,153                                                                          | 250,561,231                                                                         | 346,749,284                                                                           | 2,170,367,723                                                                         | 181,276,080                                                                           |
| particles/ml    |                             | $4.3 \times 10^8$                                                                   | $4.3 \times 10^7$                                                                   | $2.5 \times 10^8$                                                                   | $3.4 \times 10^8$                                                                     | $2.1 \times 10^9$                                                                     | $1.8 \times 10^8$                                                                     |
